# THE JOURNAL OF NEUROPSYCHIATRY and Clinical Neurosciences

The Official Journal of the American Neuropsychiatric Association

## In this issue:

- Treatment of Resistant Obsessive-Compulsive Disorder With Ventral Capsular/Ventral Striatal Gamma Capsulotomy: A Pilot Prospective Study
- Neuropsychological Outcome of Ventral Capsular/Ventral Striatal Gamma Capsulotomy for Refractory Obsessive-Compulsive Disorder: A Pilot Study
- Preoperative Psychiatric Symptoms Following Subthalamic Nucleus Stimulation in Parkinson's Disease
- Frequency and Correlates of Involuntary Emotional Expression Disorder in Parkinson's Disease
- Psychopharmacological Treatment for Cognitive Impairment in Survivors of Traumatic Brain Injury: A Critical Review

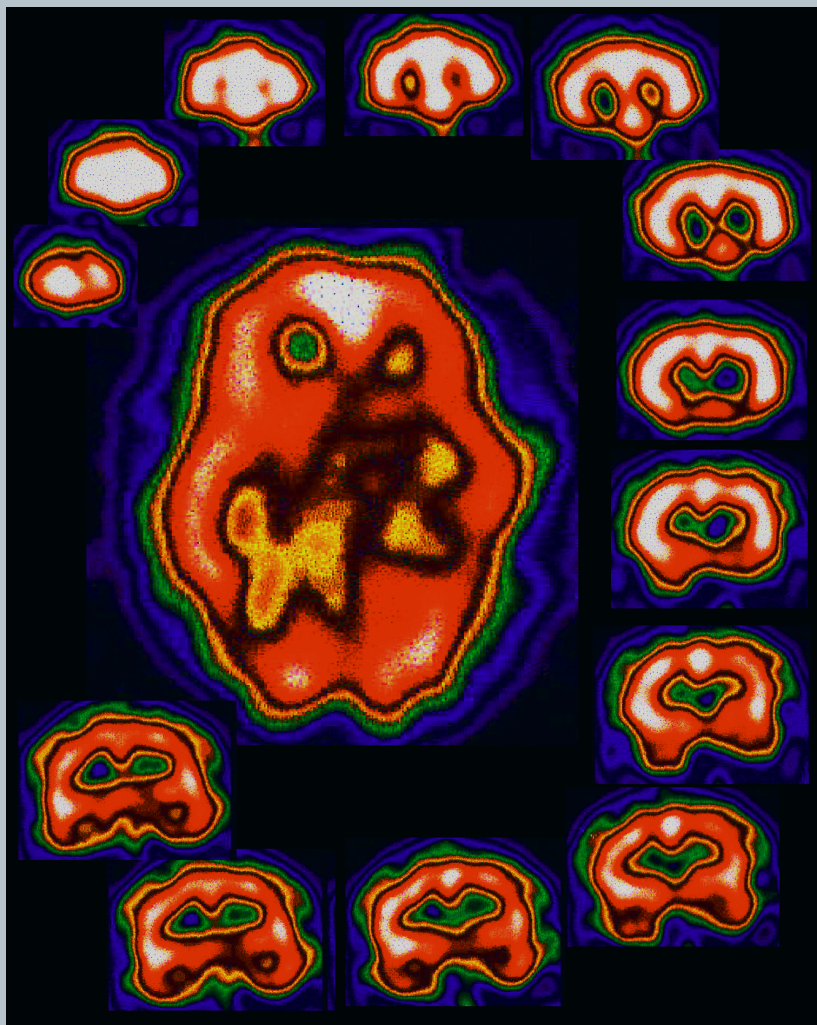

Source: http://neuro.psychiatryonline.org/doi/suppl/10.1176/jnp.2009.21.issue-4/suppl_file/cover.pdf
