---

## Statement of Ownership, Management, and Circulation

### *The Journal of Neuropsychiatry and Clinical Neurosciences*

---

Publication number: 0895-0172  
Filing date: September 29, 2009  
Issue frequency: quarterly  
No. of issues published annually: 4  
Annual subscription price: \$196.00  
Address where published, and name and headquarters address of publisher:  
American Psychiatric Publishing, Inc., 1000 Wilson Blvd., Suite 1825, Arlington, VA 22209  
Contact: Roger Domras, (703) 907-8544  
Editor: Stuart C. Yudofsky, M.D., above address  
Managing editor: Michael Roy, above address

Publication name: The Journal of Neuropsychiatry and Clinical Neurosciences  
Issue date for circulation data below: Summer 2009  
Owner: American Psychiatric Publishing, Inc., 1000 Wilson Boulevard, Suite 1825, Arlington, VA 22209  
Known bondholders, mortgagees, and other security holders owning or holding 1% or more of total amount of bonds, mortgages, or other securities: none  
Purpose, function, and nonprofit status for federal income tax purposes: has not changed during preceding 12 months

---

### Circulation

---

|                                                                                                         | <b>Average No. Copies<br/>Each Issue During<br/>Preceding 12 Months</b> | <b>Actual No. Copies of<br/>Single Issue Published<br/>Nearest to Filing Date</b> |
|---------------------------------------------------------------------------------------------------------|-------------------------------------------------------------------------|-----------------------------------------------------------------------------------|
| Total no. copies (net press run)                                                                        | 2,016                                                                   | 2,000                                                                             |
| Paid and/or requested circulation                                                                       |                                                                         |                                                                                   |
| Paid/requested outside-county mail subscriptions                                                        | 617                                                                     | 671                                                                               |
| Paid in-county subscriptions                                                                            | 0                                                                       | 0                                                                                 |
| Sales through dealers, carriers, street vendors,<br>counter sales, and other non-USPS paid distribution | 141                                                                     | 145                                                                               |
| Other classes mailed through the USPS                                                                   | 0                                                                       | 0                                                                                 |
| Total                                                                                                   | 758                                                                     | 816                                                                               |
| Free distribution by mail                                                                               |                                                                         |                                                                                   |
| Outside-county                                                                                          | 75                                                                      | 77                                                                                |
| In-county                                                                                               | 0                                                                       | 0                                                                                 |
| Other classes mailed through the USPS                                                                   | 0                                                                       | 0                                                                                 |
| Free distribution outside the mail                                                                      | 97                                                                      | 57                                                                                |
| Total free distribution                                                                                 | 172                                                                     | 134                                                                               |
| Total distribution                                                                                      | 930                                                                     | 950                                                                               |
| Copies not distributed                                                                                  | 1,086                                                                   | 1,050                                                                             |
| Total                                                                                                   | 2,016                                                                   | 2,000                                                                             |
| Percent paid and/or requested circulation                                                               | 81.5%                                                                   | 85.9%                                                                             |

I certify that all information furnished on this form is true and complete. I understand that anyone who furnishes false or misleading information on this form or who omits material or information requested on the form may be subject to criminal sanctions (including fines and imprisonment) and/or civil sanctions (including civil penalties).  
Signed by Kathy Stein, October 5, 2009.

---

## *I N F U T U R E I S S U E S*

Electroencephalographic Cerebral Dysrhythmic Abnormalities in the Trinity of Nonepileptic General Population, Neuropsychiatric, and Neurobehavioural Disorders

*Bhaskara P. Shelley, Michael R. Trimble, Nash N. Boutros*

Multiple Sclerosis, Cannabinoids and Cognition

*Lambros Messinis, Panagiotis Papathanasopoulos, Epameinondas Lyros, Andreas Kastellakis, George Panagis*

Nondysphoric Depression Following Stroke

*Sergio Paradiso, Jatin Vaidya, Daniel Tranel, Todd Kosier, Robert G. Robinson*

Changes in Regional Cerebral Blood Flow After Repetitive Transcranial Magnetic Stimulation of the Left Dorsolateral Prefrontal Cortex in Treatment-Resistant Depression

*Shinsuke Kito, Kenichi Fujita, Yoshihiko Koga*

The Neuropsychiatry and Neuropsychology of Lipoid Proteinosis

*Helena B. Thornton, Daan Nel, Dorothy Thornton, Jack van Honk, Gus A. Baker, Dan J. Stein*

A Clinical Electrophysiological Study of Emotional Lability In Patients With Systemic Lupus Erythematosus

*Jens Langosch, Stacey Rand, Boyd Ghosh, Simeran Sharma, Colin Tench, Richard Stratton, David D'Cruz, Michael Trimble, Geoff Barrett, Howard Ring*

# A Vital Resource That Will Help You See and Learn How Psychiatric Illness Affects the Brain

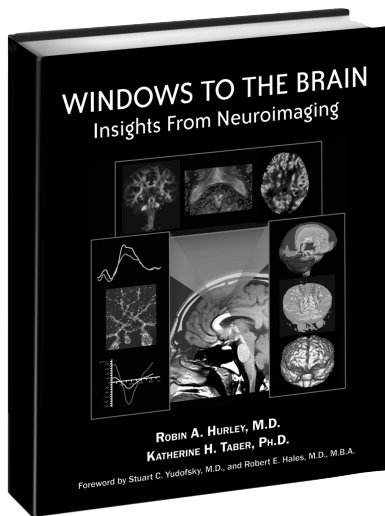

## WINDOWS to the BRAIN Insights From Neuroimaging

Robin A. Hurley, M.D., and Katherine H. Taber, Ph.D.  
Foreword by Stuart C. Yudofsky, M.D., and  
Robert E. Hales, M.D., M.B.A.

*Windows to the Brain* is the only book to synthesize neuroanatomical and imaging research as it pertains to selected neuropsychiatric diseases, containing all of the “Windows to the Brain” papers published from 1999-2006 in the *Journal of Neuropsychiatry and Clinical Neurosciences*. These reader-friendly summaries by more than sixty contributors present modern imaging techniques that assist in the diagnosis of neuropsychiatric illness, enhanced by easily understood color graphics of the neuroanatomical circuits of behavior, memory, and emotion. They provide a basic understanding of how to apply a variety of imaging techniques to the study of adult neuropsychiatric disease and how to use neuroimaging to assist in diagnostic work-ups for conditions ranging from sleep disorders to epilepsy to borderline personality.

Integrated, color-coded graphics present functional anatomical information in a manner that promotes understanding and use in clinical practice, while the text encompasses a wide range of diseases and injuries across the adult lifespan. The book is organized into four sections that will help readers increase their appreciation of the wide range of research and clinical applications for imaging in neuropsychiatry: chapters on imaging techniques discuss underlying principles, strengths and weaknesses, and applications; chapters on specific diseases demonstrate a range of investigative techniques; anatomy/circuit chapters focus on particular brain structures or functional neuropsychiatric circuits; and final chapters present image-based approaches to understanding or selecting treatment options. Some of the applications described are:

- fMRI in posttraumatic stress disorder that reveals the delicate balance between the structures of the emotion and memory tracks
- High-resolution MRI and nuclear imaging that distinguish between panic disorder and simple partial seizure disorder
- Functional imaging studies that detect corticobasal degeneration, as a means of better understanding dementia
- Newer imaging techniques in identifying progressive multifocal leukoencephalopathy, to enable more rapid and reliable tailoring of individual therapy for HIV
- Functional neuroimaging in the study of fear, in order to better understand and treat anxiety-based psychiatric disorders
- Neuroimaging studies in conversion disorder, showing implications for the disruption of selfhood in dissociative identity disorder and schizophrenia
- FDG-PET scans to look for predictors of treatment response in childhood-onset obsessive-compulsive disorder

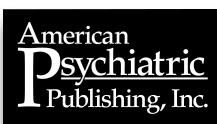

2008 • 263 pages • ISBN 978-1-58562-302-0 • Hardcover • \$79.00 • Item #62302

To order visit our website: [www.appi.org](http://www.appi.org) or call: 1-800-368-5777

Please reference priority code AH933 when ordering. Follow us on [facebook](#) and [twitter](#)

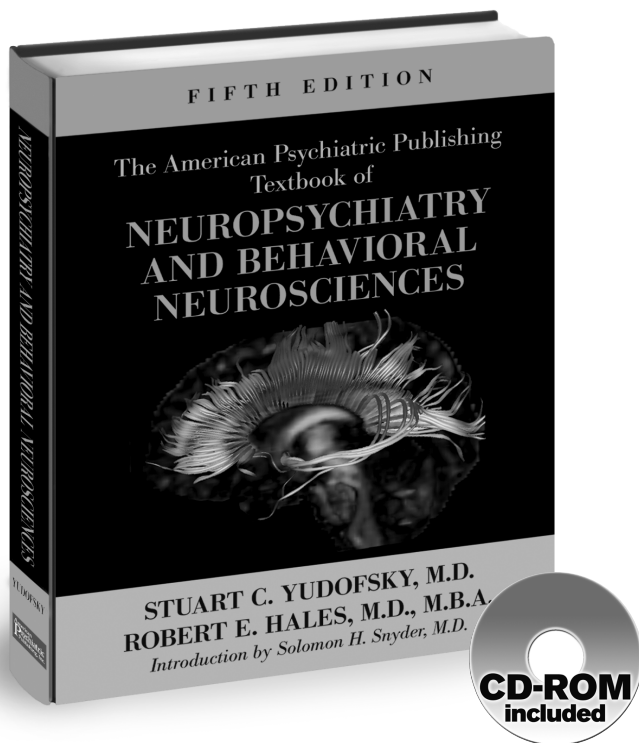

# The Fifth Edition of The American Psychiatric Publishing Textbook of Neuropsychiatry and Behavioral Neurosciences

Stuart C. Yudofsky, M.D., and Robert E. Hales, M.D., M.B.A.  
With Introduction by Solomon H. Snyder, M.D.

Since the publication of the Fourth Edition of this *Textbook* six years ago, we have continued to witness explosive growth in our knowledge base in structural and functional brain imaging, electrophysiology and electrodiagnosis, cellular and molecular biology, genetics, and neuropsychopharmacology—to name just a few. To convey this intensified focus in neurosciences and to acknowledge the recognition by the American Neuropsychiatric Association and by the United Council for Neurological Subspecialties of new subspecialty status in neuropsychiatry and behavioral neurology, the editors have

added “*Behavioral Neurosciences*” to the title of this seminal work, while increasing its already impressive clinical utility and practicality. Among the many highlights of the Fifth Edition are:

- An extensively updated chapter on the cellular and molecular biology of the neuron
- An expanded chapter on the epidemiology and genetics of neuropsychiatric disorders
- An extensively revised and expanded chapter on the neuropsychiatric aspects of delirium
- A comprehensive revision and expansion of the chapter on clinical and functional neuroimaging

In this volume’s five main sections, you’ll find *basic principles of neuroscience, assessment, symptomatologies, neuropsychiatric disorders, and neuropsychiatric treatments*

## CD-ROM Included!

The accompanying CD in PowerPoint presentation format contains a wealth of material to enhance classroom presentation, study, and clinical use. It includes all 170 tables and all 250 figures, many in color, with their explanatory legends, easy to access and organized chapter by chapter with context provided—plus, Highlights for the Clinician summarizing the key clinical points for each chapter; locator menus; useful links; and a topic outline.

2008 • 1,360 pages • ISBN 978-1-58562-239-9 • Hardcover • \$285.00 • Item #62239

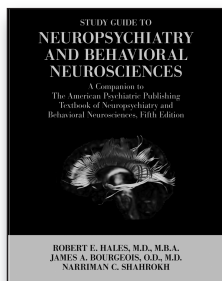

## Study Guide to Neuropsychiatry and Behavioral Neurosciences

A Companion to The American Psychiatric  
Publishing Textbook of Neuropsychiatry and  
Behavioral Neurosciences, Fifth Edition

Robert E. Hales, M.D., M.B.A.,  
James A. Bourgeois, O.D., M.D., and  
Nariman C. Shahrokh

*Study Guide to Neuropsychiatry and Behavioral Neurosciences* is a question-and-answer companion that allows you to evaluate your mastery of the subject matter as you progress

through the corresponding textbook. The *Study Guide* is made up of 246 questions divided into individual quizzes of 5-10 questions each that correspond to chapters in *The American Psychiatric Publishing Textbook of Neuropsychiatry and Behavioral Neurosciences*, Fifth Edition. Questions are followed by an Answer Guide that references relevant text (including the page number) in the *Textbook* to allow quick access to needed information. Each answer is accompanied by a discussion that addresses not only the correct response but also explains why other responses are not correct.

2008 • 202 pages • ISBN 978-1-58562-303-7 • Paperback  
\$49.00 • Item #62303

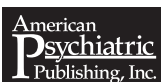

To order visit our website: [www.appi.org](http://www.appi.org) or call: 1-800-368-5777

Please reference priority code AH934 when ordering.

Follow us on [facebook](#) and [twitter](#)

*Save the Date!*

# 163<sup>RD</sup> ANNUAL MEETING AMERICAN PSYCHIATRIC ASSOCIATION May 22-26, 2010

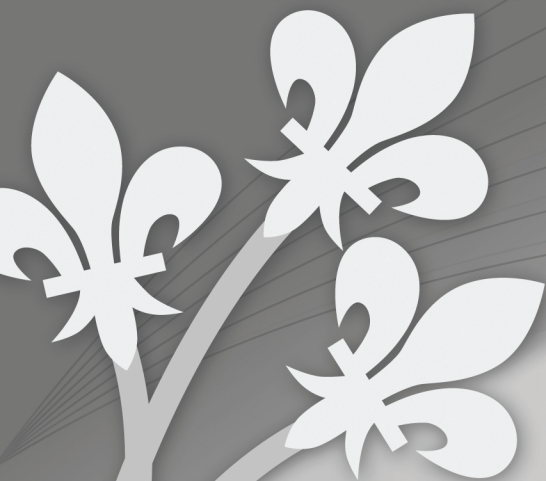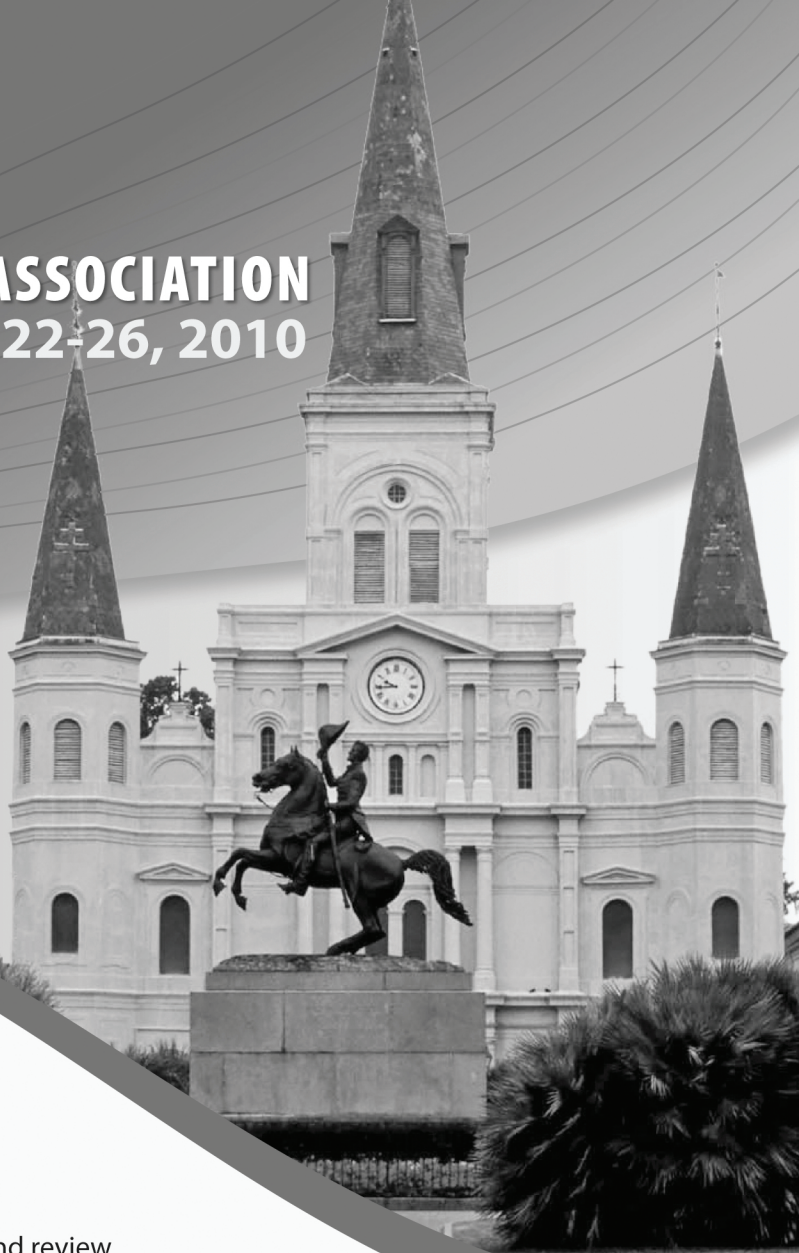

**Join us for the premier scientific meeting of the year in the unique, historic destination of New Orleans.**

#### **Reasons to attend the 2010 APA Annual Meeting**

- Earn *AMA PRA Category 1 Credit™*.
- Listen to world-renowned speakers.
- Attend state-of-the-art clinical practice updates and review cutting-edge science.
- Participate in the ever popular 'Advances in...' series.
- Attend the Frontiers in Science and Distinguished Psychiatrists lectures.
- Save and order the 2010 Annual Meeting Online and DVD highlights at exclusive attendee prices.

#### **Reasons to visit New Orleans – a city that inspires and intrigues**

- Indulge your senses and savor the rich cultural experience of New Orleans.
- Take a musical journey to the birthplace of jazz.
- Immerse yourself in vibrant, diverse neighborhoods, including the historic French Quarter.
- Delight in a culinary adventure in a city with cuisines as rich and varied as its music.
- Experience an exciting city rich in architecture, living history, traditions, and customs.

*New Orleans is all this and more...*

**Advance Member Registration Opens**

November 17, 2009

[www.psych.org](http://www.psych.org)

**NEW ORLEANS, LA**  
**MAY 22-26, 2010**

**PRIDE & PROMISE:  
TOWARD A NEW  
PSYCHIATRY**

**163<sup>RD</sup> ANNUAL MEETING  
AMERICAN PSYCHIATRIC ASSOCIATION**

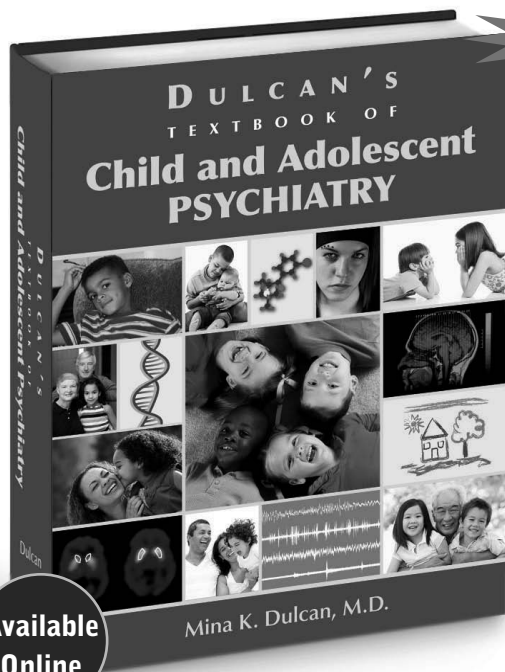

**NEW!**

# Dulcan's Textbook of Child and Adolescent Psychiatry

Edited by Mina K. Dulcan, M.D.

**D**ulcan's *Textbook of Child and Adolescent Psychiatry* supplants the previous textbook edited by Jerry Wiener and Mina Dulcan—not with a new edition, but rather a new book that offers a fresh look at the field of child mental health. It preserves Wiener's vision of a clinically focused textbook useful to trainees and practitioners in a variety of specialties,

providing the most up-to-date and comprehensive text in child and adolescent psychiatry as presented by more than 110 contributors who distill their knowledge and expertise into a single authoritative volume.

Each chapter highlights what we know about evidence-based practices in assessment and treatment, while sections on future research point toward current pressing questions. At the end of each chapter are educational summary points. Of the 65 chapters, 56 feature new lead authors, chosen to represent the expertise of disciplines ranging from pediatrics and neurology to sleep medicine and family therapy.

## AMONG ITS KEY FEATURES:

- Chapters on evaluation are developmentally focused, with a separate chapter for each age range.
- The section on diagnosis and assessment has been reconfigured and includes a new chapter on neurological examination and the use of EEG and imaging.
- Eighteen chapters on specific disorders encompass clinical description, diagnosis, epidemiology, comorbidity, etiology, prevention, prognosis, evaluation, treatment approaches, and research directions.
- Special topics include new chapters on bereavement and traumatic grief; ethnic, cultural, and religious issues; aggression and violence; and fundamentals of genetics relevant to child and adolescent psychiatry.
- Additional chapters address special clinical considerations such as children of ill parents AND legal/ethical issues
- Wide-ranging emphasis on treatment—expanded from seven to eighteen chapters—includes psychopharmacology, brain-based innovative treatments, and a spectrum of psychosocial approaches that focus on individual, family, therapeutic milieu, and systemic models of care.
- A new section on consultation provides guidance on interactions with schools, primary care practitioners, and the juvenile justice system.

Scholarly and practical, *Dulcan's Textbook of Child and Adolescent Psychiatry* is a core resource for child and adolescent psychiatry training and will also serve as a reference for practitioners in psychiatry, pediatrics, neurology, psychology, nursing, and social work.

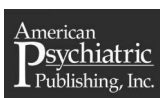

The First and Last Word in Psychiatry

2010 • 1,104 pages • ISBN 978-1-58562-323-5 • Hardcover • \$239.00 • Item #62323

**Order Online:** [www.appi.org](http://www.appi.org) • **Toll Free:** 1-800-368-5777

**Fax:** 703-907-1091 • **Email:** [appi@psych.org](mailto:appi@psych.org) • Find us on Facebook and Twitter. AH952

# American Neuropsychiatric Association

The American Neuropsychiatric Association (ANPA), established in 1988, is an organization of professionals in neuropsychiatry, behavioral neurology, neuropsychology and the clinical neurosciences. Our mission is to improve the lives of people with disorders at the interface of psychiatry and neurology through clinical care, education, advocacy and research.

The strength of the organization is our diversity of membership, which is comprised of professionals in neuropsychiatry, behavioral neurology, neuropsychology, neuroradiology, neuropathology, and neurosurgery as well as the basic neurosciences, who share clinical and/or academic interests in neuropsychiatry. The interdisciplinary nature of the membership encourages collaboration among educators, clinicians, researchers, students and trainees in research presentations, symposia, workshops and/or continuing education courses. *The Journal of Neuropsychiatry and Clinical Neurosciences (JNCN)* is the official publication of the organization, and is a benefit of membership.

ANPA holds an annual scientific meeting and provides up to 30 CME/CE credits. Members are encouraged to submit their work for presentation at these annual meetings. Travel awards are available for promising young investigators. Annual meeting abstracts and proceedings are published in *JNCN*.

ANPA has taken an active role in the creation of subspecialty certification for neuropsychiatry including developing a core curriculum and setting up guidelines for training in neuropsychiatry. As a result, Behavioral Neurology & Neuropsychiatry was approved as a subspecialty by the Unified Council for Neurologic Subspecialties (UCNS) in 2004.

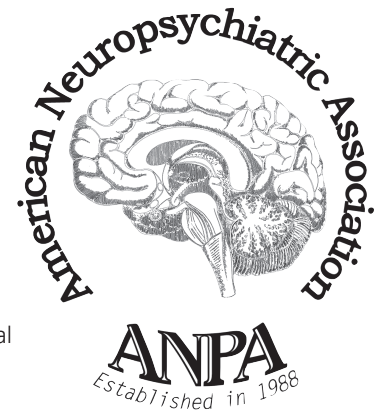

## Contact Information

### Benefits of Membership

- Subscription to *The Journal of Neuropsychiatry and Clinical Neurosciences (JNCN)*
- Discount on subscriptions to PsychiatryOnline.com including DSM Premium and DSM Premium Plus
- Opportunities for presentation at the annual meeting with accepted abstracts published in the *JNCN*
- Significantly reduced registration fees at the annual meeting
- Newsletters, news updates, information on job and training opportunities, research and meeting information on the ANPA web site: [www.anpaonline.org](http://www.anpaonline.org)
- Discounted membership and meeting registration fees for trainees
- Collaboration in clinical, educational and research activities and the opportunity to interact with senior colleagues
- Opportunity to participate on committees and in the future leadership of ANPA
- Opportunity to participate in on-line forums for discussion of research, clinical cases and/or current issues related to neuropsychiatric practice
- Opportunity to join Special Interest Groups for members who have common interests in specific research, clinical cases, practice issues or educational areas

Website:  
[www.anpaonline.org](http://www.anpaonline.org)

Email:  
[anpa@osu.edu](mailto:anpa@osu.edu)

Phone:  
614-447-2077

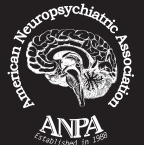

### Join ANPA Now!

**Don't miss ANPA's 21<sup>st</sup> Annual Meeting**  
**Tampa Marriott Waterside Hotel**  
**and Marina**  
**March 17 – 20, 2010**

# Tampa, Florida

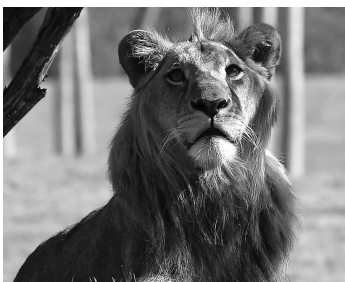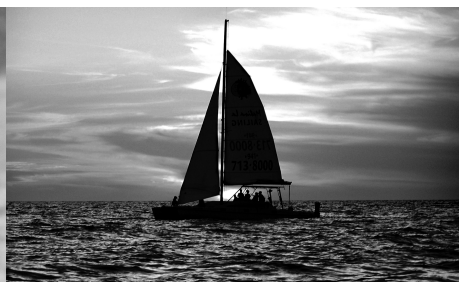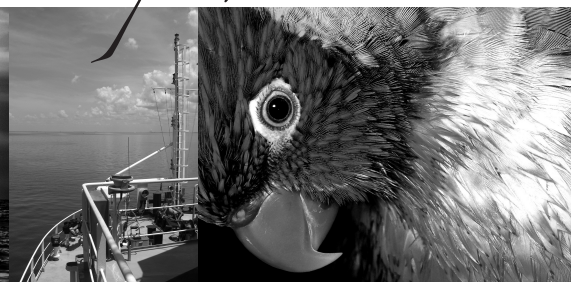

Join online at: <http://www.anpaonline.org/10117.cfm>

# American Neuropsychiatric Association

## 21st Annual Meeting

Tampa

The Marriott Tampa Waterside Hotel and Marina

Florida

March 17-20, 2010

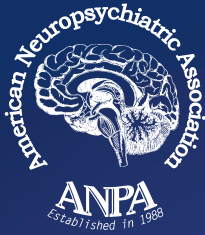

Complete registration and meeting information at:

[www.anpaonline.org](http://www.anpaonline.org)

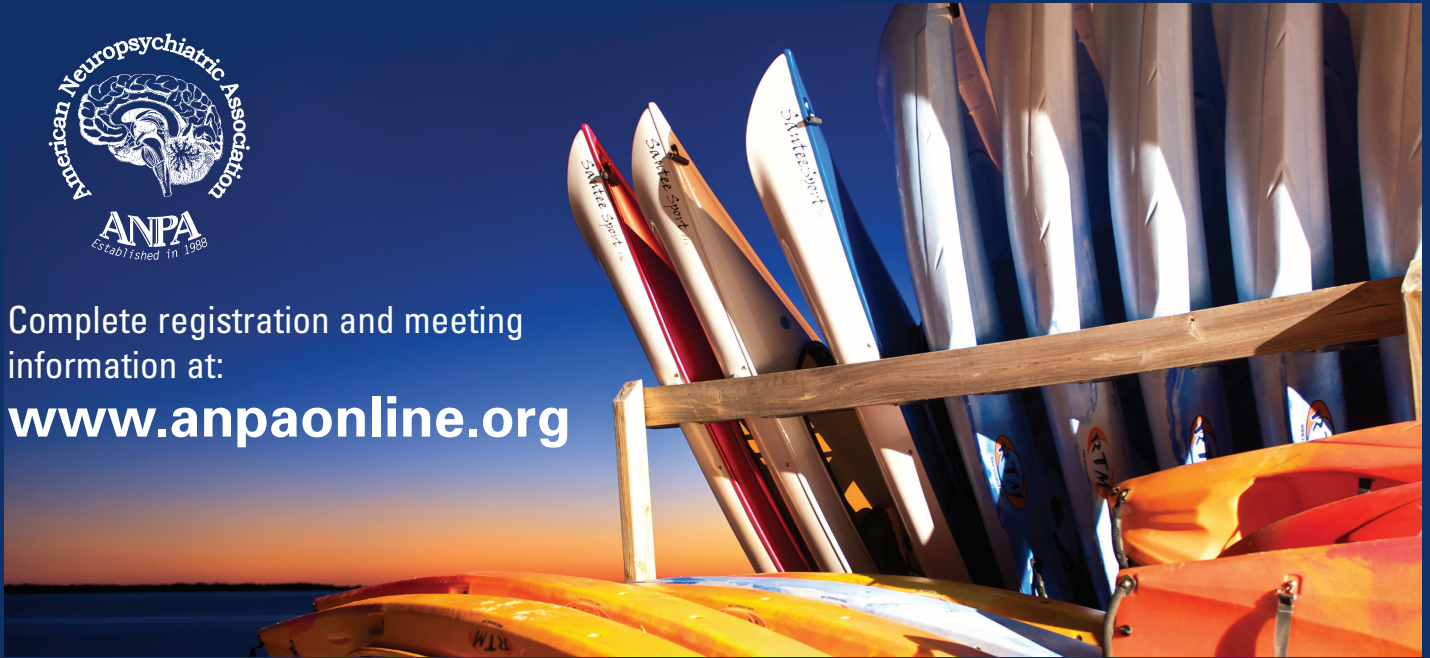

## Don't miss ANPA's 21<sup>st</sup> annual meeting

### Keynote Address:

*Daniel R. Weinberger, M.D. – Genes and Mental Illness: What's the Connection?*

### Sessions will include:

- Neurocognitive Disorders in DSM-V: Neuropsychiatric, DSM and Regulatory Perspectives
- The Neuropsychiatry of Psychosis
- Social and Moral Cognition
- Role and Mechanism of Antidepressants on Mortality and Recovery from Stroke
- An Evidence-based Review of Treatment Efficacy in Tic Disorders and Tourette Syndrome: A report of the ANPA Committee on Research
- Antecedents of Mental Illness: The Development and Functional Anatomy of the Cortico-limbic System
- Normal Pressure Hydrocephalus: Taking A Walk Down Memory Lane

For more information contact Sandy Bornstein at the ANPA Central Office:

700 Ackerman Road, Suite 625  
Columbus, Ohio USA 43202  
Phone: 614-447-2077  
E-mail: [anpa@osu.edu](mailto:anpa@osu.edu)

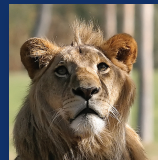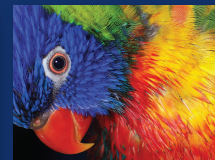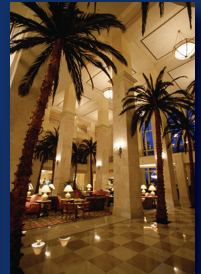

### Earn up to 28 CME credits for physicians.

This activity has been planned and implemented in accordance with the Essential Areas and policies of the Accreditation Council for Continuing Medical Education through the joint sponsorship of The Ohio State University Medical Center, Center for Continuing Medical Education and American Neuropsychiatric Association. The Ohio State University Medical Center, Center for Continuing Medical Education is accredited by the ACCME to provide continuing medical education for physicians.

The Ohio State University Medical Center designates this educational activity for a maximum of 28 *AMA PRA Category 1 Credit(s)*<sup>™</sup>. Physicians should only claim credit commensurate with the extent of their participation in the activity.

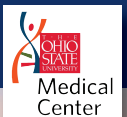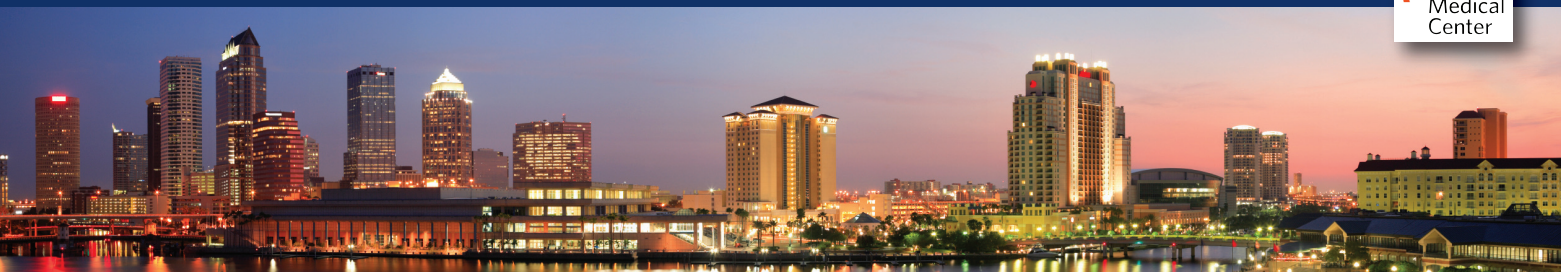

Source: http://neuro.psychiatryonline.org/doi/suppl/10.1176/jnp.2009.21.issue-4/suppl_file/front.pdf
